# Supplementary material for: The role of metacognition in promoting deep learning in MOOCs during COVID-19 pandemic
Source: PeerJ Comput Sci. 2022 Jun 15;8:e945. doi: 10.7717/peerj-cs.945 (PMC9299274; doi:10.7717/peerj-cs.945)
Supplement: Supplemental Information 1 [file peerj-cs-08-945-s001.xlsx]

## Sheet: Sheet1
Groups	Phrase1	Phrase2	Phrase3	Phrase4	Phrase5	Phrase6	Phrase7	Phrase8	Phrase9	Phrase10	Phrase11	Phrase12	Phrase13	Phrase14	Phrase15	Phrase16	Phrase17	Phrase18	Phrase19
1	5	3	5	3	4	4	5	5	4	5	4	5	5	5	5	4	4	5	5			4.25	4.71429	4.6	4.52143
1	4	5	4	5	3	3	4	4	5	4	5	4	4	4	3	5	4	4	4			4	4.28571	4	4.09524
1	4	2	5	4	5	4	5	5	5	3	4	5	4	3	3	5	5	4	5			4.25	4.14286	4.4	4.26429
1	5	4	3	4	4	4	5	5	4	5	5	5	5	5	5	4	5	5	5			4.25	4.85714	4.8	4.63571
1	3	5	4	4	3	2	3	4	2	4	3	4	2	3	4	3	3	2	2			3.5	3.14286	2.8	3.14762
1	4	3	4	5	4	4	4	3	5	5	4	5	5	4	4	5	4	5	4			3.875	4.42857	4.4	4.23452
1	5	5	3	3	4	3	4	5	4	4	5	5	4	4	4	4	5	5	4			4	4.42857	4.4	4.27619
1	5	2	5	4	4	4	5	2	4	3	5	3	5	3	5	4	3	4	5			3.875	3.57143	4.2	3.88214
1	5	4	4	5	5	4	5	5	5	5	3	4	4	5	5	5	4	4	5			4.625	4.42857	4.6	4.55119
1	4	5	5	5	3	3	4	4	5	4	5	5	5	4	4	3	5	5	4			4.125	4.57143	4.2	4.29881
1	5	2	2	2	5	4	5	5	5	5	5	3	5	3	3	5	5	4	5			3.75	4.42857	4.4	4.19286
1	5	5	3	5	5	4	4	4	5	4	5	5	5	4	4	5	4	5	3			4.375	4.57143	4.2	4.38214
1	5	3	5	3	2	3	4	4	5	5	5	4	3	5	5	4	4	3	5			3.625	4.42857	4.2	4.08452
1	5	4	4	5	4	4	4	5	5	4	4	5	5	3	4	2	4	5	5			4.375	4.42857	4	4.26786
1	4	5	3	2	3	3	5	3	4	4	6	3	3	4	5	5	5	4	4			3.5	3.85714	4.6	3.98571
1	4	3	3	4	4	5	3	4	5	5	3	4	5	4	5	5	5	3	4			3.75	4.28571	4.4	4.14524
1	4	5	5	5	5	4	4	5	4	4	5	5	4	5	4	4	4	5	3			4.625	4.57143	4	4.39881
1	3	5	2	5	4	3	5	4	3	5	3	4	3	4	4	4	5	5	5			3.875	3.71429	4.6	4.0631
1	2	4	4	5	4	3	2	5	4	3	5	5	4	3	5	5	5	4	5			3.625	4.14286	4.8	4.18929
1	3	5	5	3	5	2	4	4	3	4	5	3	4	3	5	4	4	4	3			3.875	3.71429	4	3.8631
1	4	4	3	4	3	4	3	2	5	5	4	5	5	5	3	4	5	2	5			3.375	4.42857	3.8	3.86786
1	5	5	4	4	4	4	5	5	5	5	5	4	5	4	4	3	5	5	5			4.5	4.71429	4.4	4.5381
1	4	4	3	5	5	5	3	4	3	5	3	5	5	5	5	5	4	4	4			4.125	4.28571	4.4	4.27024
1	3	2	4	3	5	3	5	5	5	5	4	5	4	4	5	4	5	5	4			3.75	4.57143	4.6	4.30714
1	3	5	5	4	3	5	4	3	3	5	4	3	3	3	3	4	5	5	4			4	3.42857	4.2	3.87619
1	4	4	4	5	4	4	2	5	4	3	5	5	5	5	5	5	4	4	3			4	4.57143	4.2	4.25714
1	5	4	4	5	5	5	5	1	4	5	4	4	4	4	5	3	4	5	4			4.25	3.71429	4.2	4.05476
2	2	2	2	4	3	2	5	4	2	4	5	5	5	5	2	4	4	3	3			3	4.28571	3.2	3.49524
2	4	5	5	2	3	3	3	4	5	4	2	3	3	2	4	3	4	4	4			3.625	3.28571	3.8	3.57024
2	5	3	2	5	4	3	2	3	3	5	4	4	4	4	3	4	5	5	4			3.375	3.85714	4.2	3.81071
2	3	3	3	3	2	2	4	5	4	4	4	4	2	2	4	4	4	3	4			3.125	3.57143	3.8	3.49881
2	3	2	1	4	3	4	5	2	2	3	5	2	3	4	4	3	4	4	5			3	3	4	3.33333
2	2	5	3	5	4	2	2	4	5	4	3	3	3	4	5	5	2	4	3			3.375	3.71429	3.8	3.62976
2	5	4	3	5	2	3	2	3	2	3	4	3	4	3	4	4	4	4	4			3.375	3.14286	4	3.50595
2	5	3	4	5	2	3	3	4	4	4	5	3	4	4	5	3	4	2	3			3.625	4	3.4	3.675
2	4	1	2	2	4	3	5	2	3	5	3	2	5	2	4	1	5	3	2			2.875	3.14286	3	3.00595
2	3	3	5	3	3	4	4	3	5	2	5	5	5	2	3	4	5	5	4			3.5	3.85714	4.2	3.85238
2	5	5	4	4	4	5	2	2	3	3	2	5	4	4	5	4	4	4	1			3.875	3.28571	3.6	3.5869
2	3	3	3	4	2	2	5	5	3	5	5	5	3	4	4	2	3	4	5			3.375	4.28571	3.6	3.75357
2	5	5	5	3	3	2	2	3	3	4	4	4	4	4	3	5	4	1	4			3.5	3.71429	3.4	3.5381
2	1	1	3	3	4	1	4	5	1	4	3	3	3	1	5	4	5	5	3			2.75	2.85714	4.4	3.33571
2	2	5	1	3	4	3	3	2	5	3	3	5	3	4	4	3	5	4	4			2.875	3.57143	4	3.48214
2	5	2	4	1	1	4	4	4	3	2	5	3	4	3	3	4	4	4	4			3.125	3.42857	3.8	3.45119
2	2	1	3	5	5	5	5	5	4	5	5	4	2	2	5	4	5	4	5			3.875	3.85714	4.6	4.11071
2	1	4	5	1	5	3	2	2	4	4	2	5	4	5	4	3	4	5	5			2.875	3.71429	4.2	3.59643
2	5	5	1	4	3	3	3	4	5	5	3	1	5	4	5	4	3	4	4			3.5	3.85714	4	3.78571
2	4	2	3	3	4	2	4	1	1	4	4	4	3	3	4	4	2	4	2			2.875	2.85714	3.2	2.97738
2	4	1	4	1	2	4	5	5	5	3	3	5	5	2	3	5	4	3	3			3.25	4	3.6	3.61667
2	3	3	4	5	5	4	3	2	4	4	4	4	2	4	1	4	5	4	3			3.625	3.42857	3.4	3.48452
2	5	5	2	3	4	4	3	5	3	5	3	3	4	4	4	3	5	3	4			3.875	3.85714	3.8	3.84405
2	4	4	2	4	3	5	4	3	5	4	5	5	5	3	5	5	4	4	4			3.625	4.28571	4.4	4.10357
2	5	3	3	2	5	3	2	5	2	3	2	5	4	5	4	4	3	4	3			3.5	3.71429	3.6	3.60476
2	4	5	5	3	3	1	3	4	5	5	5	4	5	4	5	3	4	4	4			3.5	4.57143	4	4.02381
2	4	4	4	5	4	5	5	5	4	4	4	5	5	3	1	4	4	3	4			4.5	4.28571	3.2	3.99524
2	3	4	2	2	2	2	3	2	5	5	5	3	1	5	4	5	3	3	4			2.5	3.71429	3.8	3.3381
2	3	3	5	2	5	4	5	1	5	4	3	4	4	2	4	4	2	4	5			3.5	3.28571	3.8	3.52857
2	3	1	4	5	4	5	4	2	4	5	5	4	5	5	3	4	5	4	5			3.5	4.28571	4.2	3.99524
2	1	1	3	4	2	2	2	5	3	3	4	5	2	4	5	2	4	4	2			2.5	3.71429	3.4	3.20476
2	5	5	5	5	4	1	5	3	5	4	4	2	4	4	1	4	4	5	4			4.125	3.71429	3.6	3.8131
